# Supplementary material for: Functional traits drive the contribution of solar radiation to leaf litter decomposition among multiple arid-zone species
Source: PubMed Central journal article supplement (PMC4539537; doi:10.1038/srep13217), 2015-08-18
Supplement: srep13217-s1.pdf [file srep13217-s1.pdf]

**Functional traits drive the contribution of solar radiation to leaf litter  
decomposition among multiple arid-zone species**

Xu Pan<sup>1,2,3</sup>, Yao-Bin Song<sup>1</sup>, Guo-Fang Liu<sup>3</sup>, Yu-Kun Hu<sup>3</sup>, Xue-Hua Ye<sup>3</sup>, William K.  
Cornwell<sup>4,5</sup>, Andreas Prinzing<sup>6</sup>, Ming Dong<sup>1,3\*</sup>, Johannes H.C. Cornelissen<sup>4</sup>

<sup>1</sup>Key Laboratory of Hangzhou City for Ecosystem Protection and Restoration,  
College of Life and Environmental Sciences, Hangzhou Normal University,  
Hangzhou, China

<sup>2</sup>Institute of Wetland Research, Chinese Academy of Forestry, Beijing, China

<sup>3</sup>State Key Laboratory of Vegetation and Environmental Change, Institute of Botany,  
Chinese Academy of Sciences, Beijing, China

<sup>4</sup>Department of Ecological Science, VU University, Amsterdam, the Netherlands

<sup>5</sup>Evolution & Ecology Research Centre, School of Biological, Earth and Environmental  
Sciences, University of New South Wales, Sydney, Australia

<sup>6</sup>Université de Rennes 1, Centre National de la Recherche Scientifique, Rennes,  
France

**Supplementary Fig. S1 The pattern for mass losses over time across 13 arid-zone species.**

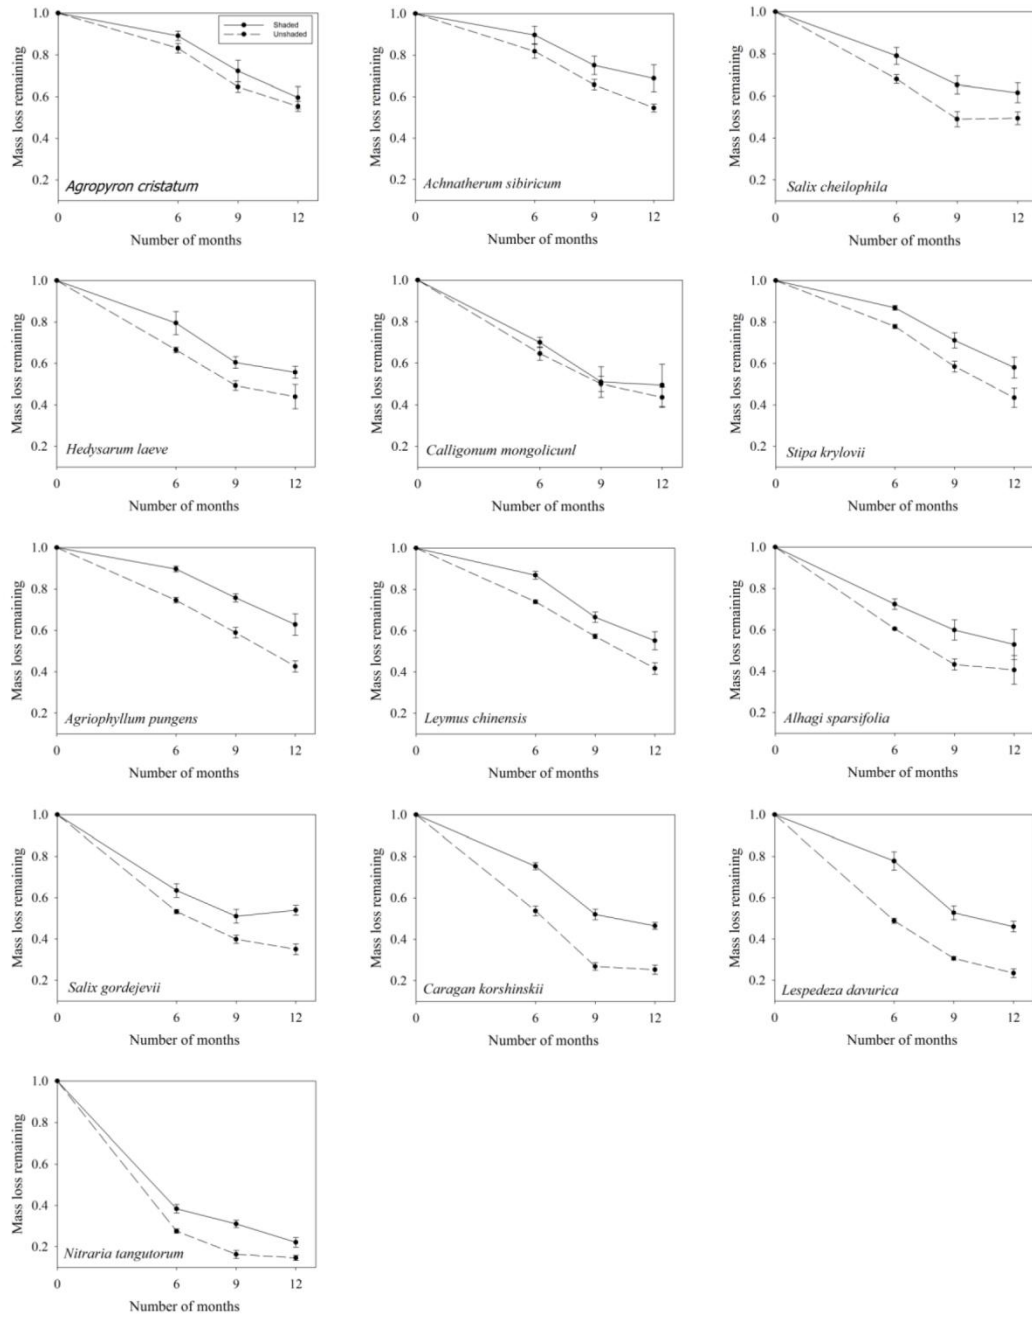

**Supplementary Table S2** General linear regression between the decomposition constant  $k$ -values ( $k_1$ ,  $k_2$ ,  $k_1 - k_2$ ) and the litter traits (total C, total N, C/N, SLA). A best subset search was applied to avoid multicollinearity among independent variables (adjusted  $R^2$  criterion optimizing  $R^2$  while accounting for numbers of variables, STATISTICA v. 7.0).

For  $k_1$ :

|           | Comment | Parameter | Std Err | $t$   | $P$         |
|-----------|---------|-----------|---------|-------|-------------|
| Intercept |         | 0.0018    | 0.0026  | 0.69  | 0.51        |
| Total N   |         | 0.0022    | 0.0008  | 2.64  | <b>0.03</b> |
| Total C   |         | -0.0001   | 0.0000  | -2.14 | 0.06        |
| C/N       |         | 0.0001    | 0.0000  | 1.26  | 0.24        |
| SLA       | Pooled  |           |         |       |             |

For  $k_2$ :

|           | Comment | Parameter | Std Err | $t$   | $P$         |
|-----------|---------|-----------|---------|-------|-------------|
| Intercept |         | 0.0026    | 0.0017  | 1.53  | 0.16        |
| Total N   |         | 0.0014    | 0.0006  | 2.62  | <b>0.03</b> |
| Total C   |         | -0.0001   | 0.0000  | -3.11 | <b>0.01</b> |
| C/N       |         | 0.0000    | 0.0000  | 1.31  | 0.22        |
| SLA       | Pooled  |           |         |       |             |

For  $k_1 - k_2$ :

|           | Comment | Parameter | Std Err  | $t$     | $P$         |
|-----------|---------|-----------|----------|---------|-------------|
| Intercept |         | -0.0004   | 0.0004   | -1.08   | 0.31        |
| Total N   |         | 0.0004    | 0.0002   | 2.06    | 0.07        |
| Total C   | Pooled  |           |          |         |             |
| C/N       | Pooled  |           |          |         |             |
| SLA       |         | 0.000082  | 0.000035 | 2.32771 | <b>0.04</b> |

**Supplementary Table S3** Plant species used in the decomposition experiment. N or F stands for Nitrogen fixer (NF) or not (/); SFG stands for Shrub (S), Forb (F) or Grass (G); C stands for total carbon concentration of initial litters; N stands for total nitrogen concentration of initial litters; Site 1-5 stands for Ordos, Xilingol, Naiman and Fukang.

| Species list                                       | Site | NF | SFG | C<br>(%) | N<br>(%) | C/N   | SLA<br>(g cm <sup>-2</sup> ) |
|----------------------------------------------------|------|----|-----|----------|----------|-------|------------------------------|
| <i>Hedysarum laeve</i> Maxim.(HL)                  | 1    | NF | S   | 50.19    | 2.56     | 19.64 | 9.98                         |
| <i>Lespedeza davurica</i> (Laxm.) Schindl. (LD)    | 1    | NF | S   | 48.91    | 1.84     | 26.64 | 12.09                        |
| <i>Agriophyllum pungens</i> Link ex A.Dietr. (AP)  | 1    | /  | F   | 43.70    | 0.93     | 46.88 | 14.03                        |
| <i>Salix cheilophila</i> C.K.Schneid. (SC)         | 1    | /  | S   | 54.66    | 0.92     | 59.28 | 9.41                         |
| <i>Leymus chinensis</i> (Trin.) Tzvelev. (LC)      | 2    | /  | G   | 50.22    | 1.74     | 28.93 | 10.49                        |
| <i>Achnatherum sibiricum</i> (L.) Keng. (AS)       | 2    | /  | G   | 49.58    | 1.63     | 30.50 | 8.22                         |
| <i>Stipa krylovii</i> Roshev. (SK)                 | 2    | /  | G   | 51.36    | 1.31     | 39.08 | 5.00                         |
| <i>Agropyron cristatum</i> (L.) Gaertn. (AC)       | 2    | /  | G   | 52.38    | 1.07     | 48.96 | 6.52                         |
| <i>Caragan korshinskii</i> Kom. (CK)               | 3    | NF | S   | 52.20    | 2.93     | 17.79 | 13.26                        |
| <i>Salix gordejvii</i> Y.L.Chang & Skvortsov. (SG) | 3    | /  | S   | 54.75    | 2.00     | 27.37 | 12.43                        |
| <i>Calligonum mongolicum</i> Turcz. (CM)           | 4    | /  | S   | 37.20    | 1.34     | 27.81 | 2.36                         |
| <i>Alhagi sparsifolia</i> Shap. (AL)               | 4    | NF | S   | 47.42    | 1.80     | 26.41 | 6.57                         |
| <i>Nitraria tangutorum</i> Bobrov. (NT)            | 4    | /  | S   | 35.43    | 2.90     | 12.21 | 7.84                         |

Nomenclature of species follows

Song *et al.*, 2002; Zeng *et al.*, 2002; Liu *et al.*, 2007; Zhang & Zhu, 2009 and Flora of China.

Liu F.H., *et al.* Responses of *Hedysarum laeve*, a guerrilla clonal semi-shrub in the Mu Us Sandland, to local sand burial. *Front Biol Chin* **2**, 431-436 (2007).

Song M.H., Dong M., Jiang G.M. Importance of clonal plants and plant species diversity in the Northeast China Transect. *Ecol Res* **17**, 705-716 (2002).

Zeng F.J., *et al.* Water relation characteristics of *Alhagi sparsifolia* and consequences for a sustainable management. *Sci Chin Ser D: Earth Sci* **45**, 125-131 (2002).

Zhang Q., Zhu X.T. Microsatellite DNA loci from the drought desert plant *Calligonum mongolicum*; Turcz. (Polygonaceae). *Conserv Genet* **10**, 1891-1893 (2009).

**Supplementary Fig. S4** Daily mean temperature under unshaded and shaded litter bags from 26<sup>th</sup> October to 22<sup>nd</sup> December. Solid line represents the temperature under unshaded conditions; dashed line represents the temperature under shaded conditions.

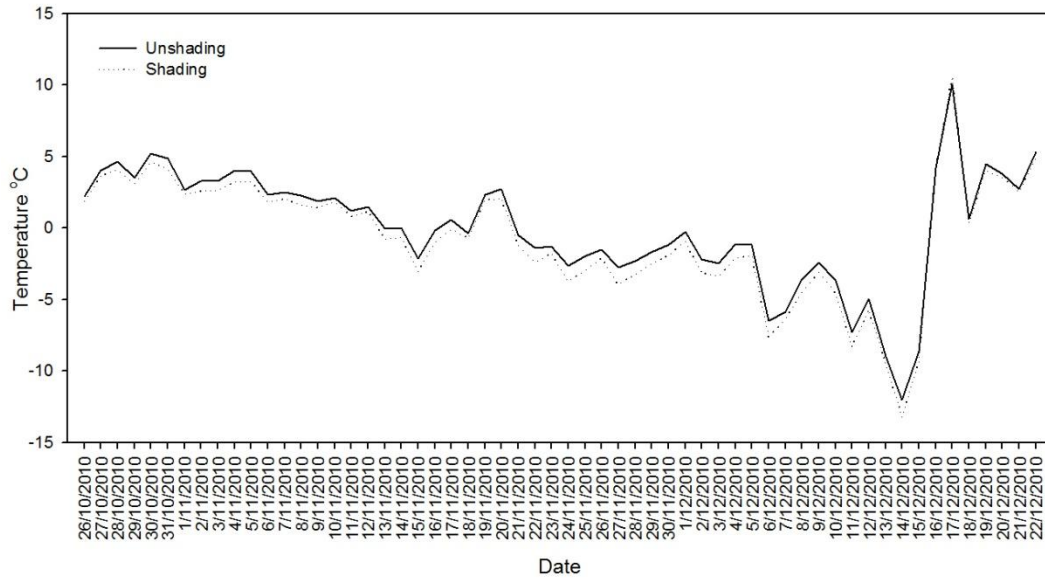

**Supplementary Table S5** Pearson's correlation coefficient between the decomposition constant  $k$ -values ( $k_1$ ,  $k_2$ ,  $k_1 - k_2$ ) and the litter traits (total C, total N, C/N, SLA). Note  $k_1$  stands for the decomposition rate under unshaded conditions;  $k_2$  stands for the decomposition rate under shaded conditions.

| Traits      | Total C       |              | Total N      |              | C/N           |              | SLA          |              |
|-------------|---------------|--------------|--------------|--------------|---------------|--------------|--------------|--------------|
|             | R             | <i>P</i>     | R            | <i>P</i>     | R             | <i>P</i>     | R            | <i>P</i>     |
| $k_1$       | -0.434        | 0.138        | <b>0.738</b> | <b>0.004</b> | <b>-0.653</b> | <b>0.016</b> | 0.247        | 0.416        |
| $k_2$       | <b>-0.588</b> | <b>0.035</b> | <b>0.681</b> | <b>0.010</b> | <b>-0.646</b> | <b>0.017</b> | -0.040       | 0.898        |
| $k_1 - k_2$ | -0.040        | 0.897        | <b>0.574</b> | <b>0.040</b> | -0.438        | 0.134        | <b>0.616</b> | <b>0.025</b> |
